# Supplementary material for: Strain-specific joint invasion and colonization by Lyme disease spirochetes is promoted by outer surface protein C
Source: PubMed Central journal article supplement (PMC7255614; doi:10.1371/journal.ppat.1008516), 2020-05-15
Supplement: ppat.1008516.s008.pdf [file ppat.1008516.s008.pdf]

**S2 Table. Oligonucleotides<sup>#</sup>**

| Primer/Vector                        | Sequence (5' to 3') *                                                                      | Amplified DNA fragment                               | Reference  |
|--------------------------------------|--------------------------------------------------------------------------------------------|------------------------------------------------------|------------|
| OspC <sub>B31</sub> pfp/pGEX4T2      | cgGGATCCaaagatggaatacatct                                                                  | <i>OspC<sub>B31</sub>P</i>                           | [1]        |
| OspC <sub>B31</sub> prp/pGEX4T2      | cgGTCGACttaaggttttttgact                                                                   |                                                      | [1]        |
| OspC <sub>N40-D10/E9</sub> /pGEX4T2  | cgGGATCCaaagatggaatacatct                                                                  | <i>ospC<sub>N40-D10/E9</sub>P</i>                    | [1]        |
| OspC <sub>N40-D10/E9</sub> /pGEX4T2  | cgGTCGACttaaggttttttgact                                                                   |                                                      | [1]        |
| OspC <sub>PBr</sub> pfp/pGEX4T2      | cgGGATCCgattctgcatctactaat                                                                 | <i>ospC<sub>PBr</sub>P</i>                           | [1]        |
| OspC <sub>PBr</sub> prp/pGEX4T2      | cgGTCGACttaaggttttttgagc                                                                   |                                                      | [1]        |
| OspC <sub>B31-ECM</sub> pfp/pGEX4T2  | cgGGATCCagtttaacaggaaaagct                                                                 | <i>ospC<sub>B31-ECM</sub>P</i>                       | This study |
| OspC <sub>B31-ECM</sub> prp/pGEX4T2  | cgGTCGACttccacttttgcttcat                                                                  |                                                      | This study |
| pospCfp/pBSV2G                       | cgGCATGCggcaaaactgaaacaagt                                                                 | <i>pospC</i>                                         | [2]        |
| pospCrp/pBSV2G                       | cgGTCGACttttcctcctctatta                                                                   |                                                      | [2]        |
| OspC <sub>N40-D10/E9</sub> fp/pBSV2G | cgGTCGACatgaaaaagaatacatta                                                                 | <i>ospC<sub>N40-D10/E9</sub></i>                     | [1]        |
| OspC <sub>N40-D10/E9</sub> rp/pBSV2G | cgGGATCCttaaggttttttgact                                                                   |                                                      | [1]        |
| OspC <sub>PBr</sub> fp/pBSV2G        | cgGTCGACatgaaaaagaatacatta                                                                 | <i>ospC<sub>PBr</sub></i>                            | [1]        |
| OspC <sub>PBr</sub> rp/pBSV2G        | cgGGATCCttaaggttttttgagc                                                                   |                                                      | [1]        |
| OspC <sub>B31</sub> fp/pTM61 (B2949) | tttCCTGCAGGttaatttagcatattggctt                                                            | <i>ospC<sub>B31</sub> and ospC<sub>B31-ECM</sub></i> | This study |
| OspC <sub>B31</sub> rp/pTM61 (B2956) | tttCCTAGGttaaggttttttgacttcc                                                               |                                                      | This study |
| OspC <sub>B31-ECM</sub> 1            | ttcagaacacatcatagccgcatcaatcattc<br>cattaatccttcattcatcaatccatctaattttgtt<br>ttattaggggtga | <i>ospC<sub>B31-ECM</sub></i>                        | This study |
| OspC <sub>B31-ECM</sub> 2            | agatgattgatgaatgaaggattaatgaaa<br>tgattgatgcggtatgatgttctgaaacattt<br>actaataaattaaagaa    |                                                      | This study |
| OspC <sub>B31-ECM</sub> 3            | Aattttgttttattaggggtga                                                                     |                                                      | This study |
| OspC <sub>B31-ECM</sub> 4            | Cattfactaataaattaaagaa                                                                     |                                                      | This study |
| BBRecAfp                             | gtggatctattgtattagatgaggctctcg                                                             | <i>BbRecA</i>                                        | [3]        |
| BBRecArp                             | gccaaagtctgcaacattaacacctaag                                                               |                                                      | [3]        |

|           |                                                   |                                                                                                                                             |            |
|-----------|---------------------------------------------------|---------------------------------------------------------------------------------------------------------------------------------------------|------------|
| Genfp     | atgttacgcagcagcaac                                | gentamycin resistance cassette                                                                                                              | [4]        |
| Genrp     | ttaggtggcggacttgg                                 |                                                                                                                                             | [4]        |
| ColE1fp   | ctacatacctcgctctgctaac                            | pBSV2G origin of replication                                                                                                                | [5]        |
| ColE1rp   | cgaaacccgacaggactataaa                            |                                                                                                                                             | [5]        |
| oMCS3     | tcatgagggcgccagagctcgagagagctagcagagggccctcatgaa  | MCS inserted into pTM61spc (169) to generate pTM61spc-MCS                                                                                   | This study |
| oMCS4     | tcatgagggccctctgctagctctctcgagctctggcgcgcctcatgaa |                                                                                                                                             | This study |
| PFlaB.Fwd | gagagctagctgtctgtcgcctcttgg                       | Amplification of the flagellar promoter from <i>B. burgdorferi</i> strain B31-A3 for cloning into pGEM™-T Easy (Promega corp., Madison, WI) | This study |
| PFlaB.Rev | gagagggccctatatcattcctccatgataaaa ttt             |                                                                                                                                             | This study |

\* The restriction sites used are shown as capital letters.

# The primers for plasmid profiling have been described [6, 7]. These primers are thus not included.

## References

1. Caine JA, Lin YP, Kessler JR, Sato H, Leong JM, Coburn J. *Borrelia burgdorferi* outer surface protein C (OspC) binds complement component C4b and confers bloodstream survival. *Cell Microbiol.* 2017. doi: 10.1111/cmi.12786.
2. Fischer JR, LeBlanc KT, Leong JM. Fibronectin binding protein BBK32 of the Lyme disease spirochete promotes bacterial attachment to glycosaminoglycans. *Infect Immun.* 2006;74(1):435-41.
3. Liveris D, Wang G, Girao G, Byrne DW, Nowakowski J, McKenna D, et al. Quantitative detection of *Borrelia burgdorferi* in 2-millimeter skin samples of erythema migrans lesions: correlation of results with clinical and laboratory findings. *J Clin Microbiol.* 2002;40(4):1249-53.
4. Lin YP, Benoit V, Yang X, Martinez-Herranz R, Pal U, Leong JM. Strain-specific variation of the decorin-binding adhesin DbpA influences the tissue tropism of the Lyme disease spirochete. *PLoS Pathog.* 2014;10(7):e1004238.
5. Marcinkiewicz AL, Dupuis AP, 2nd, Zamba-Campero M, Nowak N, Kraiczy P, Ram S, et al. Blood treatment of Lyme borreliae demonstrates the mechanism of CspZ-mediated complement evasion to promote systemic infection in vertebrate hosts. *Cell Microbiol.* 2019;21(2):e12998.
6. Purser JE, Norris SJ. Correlation between plasmid content and infectivity in *Borrelia burgdorferi*. *Proc Natl Acad Sci U S A.* 2000;97(25):13865-70.
7. Bunikis I, Kutschan-Bunikis S, Bonde M, Bergstrom S. Multiplex PCR as a tool for validating plasmid content of *Borrelia burgdorferi*. *J Microbiol Methods.* 2011;86(2):243-7.
