# Supplementary material for: Strain-specific joint invasion and colonization by Lyme disease spirochetes is promoted by outer surface protein C
Source: PubMed Central journal article supplement (PMC7255614; doi:10.1371/journal.ppat.1008516), 2020-05-15
Supplement: ppat.1008516.s009.pdf [file ppat.1008516.s009.pdf]

**S3 Table. pBSV2:chromosome ratio during *in vitro* culture.**

| Strain          |                                       | Bacteria/5pg DNA <sup>a</sup> |                    |                             |
|-----------------|---------------------------------------|-------------------------------|--------------------|-----------------------------|
|                 |                                       | <i>In vitro</i>               |                    |                             |
|                 |                                       | Plasmid <sup>b</sup>          | Chrom <sup>c</sup> | Plasmid /Chrom <sup>d</sup> |
| B31-A3/Vector   |                                       | 722.1<br>±2.8                 | 742.9<br>±2.8      | <b>0.97</b>                 |
| B31-<br>A3ΔospC | Vector                                | 804.7<br>±2.9                 | 813.6<br>±2.9      | <b>0.98</b>                 |
|                 | pOspC <sub>B31</sub> #2               | 669.0<br>±2.8                 | 743.9<br>±2.8      | <b>0.89</b>                 |
|                 | pOspC <sub>B31-ECM</sub> <sup>e</sup> | 701.7<br>±2.8                 | 736.4<br>±2.8      | <b>0.95</b>                 |

<sup>a</sup> Experiment displayed in Figure S4.

<sup>b</sup> Spirochetal burden determined by qPCR; shown are geometric mean ± geometric standard deviation from 10 mice.

<sup>c</sup> Spirochetal burden determined using *coIE1* primers.

<sup>d</sup> Spirochetal burden determined using *recA* primers.

<sup>e</sup> Ratio of burden determined using *coIE1* primers to burden determined using *recA* primers.

<sup>f</sup> NA, not applicable because the burdens obtained using either *recA* primers, *coIE1* primers, or both were below the detection limit of 10 bacterial copies per 100ng DNA.
