# Supplementary material for: Strain-specific joint invasion and colonization by Lyme disease spirochetes is promoted by outer surface protein C
Source: PubMed Central journal article supplement (PMC7255614; doi:10.1371/journal.ppat.1008516), 2020-05-15
Supplement: ppat.1008516.s010.pdf [file ppat.1008516.s010.pdf]

**S4 Table. OspC-encoding plasmids are retained at 21 days post-infection in Experiment 1<sup>a</sup>.**

| Strain        |                                      | Spirochetal burden (Bacteria/100ng DNA) <sup>b</sup> |                    |                             |               |                |                |               |               |                |
|---------------|--------------------------------------|------------------------------------------------------|--------------------|-----------------------------|---------------|----------------|----------------|---------------|---------------|----------------|
|               |                                      | Inoculation Site                                     |                    |                             | Tibiotarsus   |                |                | Heart         |               |                |
|               |                                      | Plasmid <sup>c</sup>                                 | Chrom <sup>d</sup> | Plasmid /Chrom <sup>e</sup> | Plasmid       | Chrom          | Plasmid /Chrom | Plasmid       | Chrom         | Plasmid /Chrom |
| B31-A3/Vector |                                      | 171.6<br>±5.1                                        | 177.6<br>±5.1      | <b>0.96</b>                 | 658.7<br>±8.5 | 794.9<br>±11.6 | <b>0.82</b>    | 95.5<br>±2.2  | 114.9±<br>7.7 | <b>0.83</b>    |
| B31-A3ΔospC   | Vector                               | 1.3<br>±1.5                                          | 2.3<br>±2.4        | <b>N.A.</b> <sup>f</sup>    | 3.2<br>±2.1   | 3.7<br>±2.6    | <b>N.A.</b>    | 3.5<br>±2.1   | 2.0<br>±1.9   | <b>N.A.</b>    |
|               | pOspC <sub>B31</sub>                 | 69.2<br>±4.8                                         | 85.3<br>±12.7      | <b>0.81</b>                 | 519.4<br>±8.0 | 648.2<br>±4.0  | <b>0.80</b>    | 112.2<br>±4.8 | 135.5±<br>2.3 | <b>0.82</b>    |
|               | pOspC <sub>N40-D10/E9</sub>          | 60.4<br>±5.1                                         | 61.2<br>±7.6       | <b>0.98</b>                 | 185.6<br>±6.5 | 173.7<br>±7.1  | <b>1.06</b>    | 208.1<br>±5.6 | 256.7±<br>2.0 | <b>0.81</b>    |
|               | pOspC <sub>PBr</sub>                 | 67.2<br>±8.2                                         | 67.6<br>±9.9       | <b>0.99</b>                 | 4.5<br>±2.7   | 10.0<br>±3.7   | <b>N.A.</b>    | 63.5<br>±4.5  | 64.4<br>±6.4  | <b>0.98</b>    |
|               | pOspC <sub>B31-ECM<sup>-</sup></sub> | 1.4<br>±1.6                                          | 2.3<br>±2.8        | <b>N.A.</b>                 | 1.3<br>±1.9   | 2.5<br>±2.6    | <b>N.A.</b>    | 2.6<br>±2.3   | 3.8<br>±2.9   | <b>N.A.</b>    |

<sup>a</sup> Experiment displayed in Figure 5.

<sup>b</sup> Spirochetal burden determined by qPCR; shown are geometric mean ± geometric standard deviation from 10 mice.

<sup>c</sup> Spirochetal burden determined using *coIE1* primers.

<sup>d</sup> Spirochetal burden determined using *recA* primers.

<sup>e</sup> Ratio of burden determined using *coIE1* primers to burden determined using *recA* primers.

<sup>f</sup> NA, not applicable because the burdens obtained using either *recA* primers, *coIE1* primers, or both were below the detection limit of 10 bacterial copies per 100ng DNA.
