# Supplementary material for: Strain-specific joint invasion and colonization by Lyme disease spirochetes is promoted by outer surface protein C
Source: PubMed Central journal article supplement (PMC7255614; doi:10.1371/journal.ppat.1008516), 2020-05-15
Supplement: ppat.1008516.s011.pdf [file ppat.1008516.s011.pdf]

**S5 Table. OspC-encoding plasmids are retained at 21 days post-infection in Experiment 2<sup>a</sup>.**

| Strain          |                          | Spirochetal burden              |                    |                             |               |               |                |               |               |                |
|-----------------|--------------------------|---------------------------------|--------------------|-----------------------------|---------------|---------------|----------------|---------------|---------------|----------------|
|                 |                          | Bacteria/100ng DNA <sup>b</sup> |                    |                             |               |               |                |               |               |                |
|                 |                          | Inoculation Site                |                    |                             | Tibiotarsus   |               |                | Heart         |               |                |
|                 |                          | Plasmid <sup>c</sup>            | Chrom <sup>d</sup> | Plasmid /Chrom <sup>e</sup> | Plasmid       | Chrom         | Plasmid /Chrom | Plasmid       | Chrom         | Plasmid /Chrom |
| B31-A3/Vector   |                          | 93.2<br>±4.9                    | 106.7<br>±6.8      | <b>0.87</b>                 | 544.0<br>±5.4 | 644.9<br>±5.6 | <b>0.84</b>    | 141.0<br>±8.5 | 170.7±<br>3.6 | <b>0.82</b>    |
| B31-<br>A3ΔospC | Vector                   | 1.9<br>±2.3                     | 2.2<br>±2.4        | <b>N.A.</b> <sup>f</sup>    | 2.9<br>±2.6   | 3.3<br>±2.7   | <b>N.A.</b>    | 1.9<br>±2.1   | 2.2<br>±2.6   | <b>N.A.</b>    |
|                 | pOspC <sub>B31</sub>     | 180.4<br>±4.2                   | 220.7<br>±3.5      | <b>0.81</b>                 | 488.6<br>±3.8 | 554.1<br>±6.5 | <b>0.89</b>    | 243.3<br>±5.4 | 246.4±<br>2.3 | <b>0.98</b>    |
|                 | pOspC <sub>B31-ECM</sub> | 1.9<br>±2.6                     | 4.2<br>±2.4        | <b>N.A.</b>                 | 1.7<br>±2.3   | 2.3<br>±2.0   | <b>N.A.</b>    | 2.6<br>±2.3   | 2.4<br>±2.2   | <b>N.A.</b>    |

<sup>a</sup> Experiment displayed in Figure S4.

<sup>b</sup> Spirochetal burden determined by qPCR; shown are geometric mean ± geometric standard deviation from 10 mice.

<sup>c</sup> Spirochetal burden determined using *coIE1* primers.

<sup>d</sup> Spirochetal burden determined using *recA* primers.

<sup>e</sup> Ratio of burden determined using *coIE1* primers to burden determined using *recA* primers.

<sup>f</sup> NA, not applicable because the burdens obtained using either *recA* primers, *coIE1* primers, or both were below the detection limit of 10 bacterial copies per 100ng DNA.
