# Supplementary material for: Strain-specific joint invasion and colonization by Lyme disease spirochetes is promoted by outer surface protein C
Source: PubMed Central journal article supplement (PMC7255614; doi:10.1371/journal.ppat.1008516), 2020-05-15
Supplement: ppat.1008516.s012.pdf [file ppat.1008516.s012.pdf]

## 1 SUPPLEMENTARY MATERIALS AND METHODS

### 2 Circular dichroism (CD) spectroscopy

3 CD analysis was performed on a Jasco 810 spectropolarimeter (Jasco Analytical Instrument,  
4 Easton, MD) under N<sub>2</sub>. CD spectra were measured at 25°C in a 1 mm path length quartz cell.  
5 Spectra of OspC<sub>B31</sub> (10 μM) and OspC<sub>B31-ECM<sup>-</sup></sub> (10 μM) were recorded in Tris buffer, and three  
6 far-UV CD spectra were recorded from 190 to 250 nm in 1 nm increments. The background  
7 spectrum of buffer without protein was subtracted from the protein spectra, and CD spectra  
8 were initially analyzed by the Spectra Manager program. Analysis of the spectra to extrapolate  
9 secondary structures was performed by Dichroweb  
10 (<http://www.cryst.bbk.ac.uk/cdweb/html/home>) using the K2D and Selcon 3 analysis programs  
11 [1].

12

### 13 Determination of surface exposure of OspC derivatives in *B. burgdorferi*.

14 Surface exposure of OspC derivatives in *B. burgdorferi* was verified by flow cytometry [2] or  
15 surface proteolysis [3]. To determine surface localization of OspC using flow cytometry, 1 × 10<sup>8</sup>  
16 *B. burgdorferi* cells were washed three times in HBSC buffer containing DB (25mM HEPES  
17 acid, 150mM sodium chloride, 1mM MnCl<sub>2</sub>, 1mM MgCl<sub>2</sub>, 0.25mM CaCl<sub>2</sub>, 0.1% glucose, and  
18 0.2% BSA, pH 7.8), and then suspended into the same buffer. To permeabilize spirochetes,  
19 pellets of 1 × 10<sup>8</sup> *B. burgdorferi* cells obtained after centrifugation of the cultures were  
20 suspended into 100% ethanol and then incubated for 1 h, followed by washing three times with  
21 HBS buffer containing DB. The spirochetes were ultimately suspended into HBS buffer  
22 containing DB. The suspensions of both intact and permeabilized spirochetes were incubated  
23 with a mixture of equal amounts of mouse antisera raised against OspC<sub>B31</sub>, OspC<sub>N40-D10/E9</sub>, and  
24 OspC<sub>PBr</sub> [3, 4] or the monoclonal antibody against FlaB CB1 (control) as primary antibodies (1:  
25 250). Alexa488-conjugated goat anti-mouse IgG (Invitrogen, Carlsbad, CA ; 1: 250) was applied  
26 as the secondary antibody. 300μl of formalin (0.1%) was then added to fix the bacteria and

27 antibodies, and the surface localization of OspC (or FlaB) was measured by flow cytometry  
28 using a Becton-Dickinson FACSCalibur (BD Bioscience, Franklin Lakes, NJ). The mean  
29 fluorescence index (MFI) of each sample was obtained from FlowJo software version 10 (Three  
30 star Inc, Ashland, OR), representing the surface production of indicated proteins. The resulting  
31 MFI of different strains was normalized to that of permeabilized *B. burgdorferi* strain B31-A3  
32 harboring the empty vector. The results shown in S3 Fig. represent the mean of four  
33 independent determinations  $\pm$  SEM. Each SEM value was no more than seven percent of its  
34 mean value.

35

36 **Construction of pOspC<sub>B31</sub> #2.** To ascertain the different phenotypes between pOspC<sub>B31</sub>- and  
37 pOspC<sub>B31-ECM<sup>-</sup></sub>-producing strains is not due to the differences of the 5' non-coding sequences to  
38 the *ospC* ATG start codon between those strains, we generated the *ospC<sub>B31</sub>*-encoding plasmid  
39 carrying the same 5' non-coding sequences as that of pOspC<sub>B31-ECM<sup>-</sup></sub>, pOspC<sub>B31</sub> #2. The pGEM-T  
40 Easy derived plasmids encoding *ospC<sub>B31</sub>* were digested with Sall and BamHI and *ospC* alleles  
41 were subcloned into pBSV2G at the Sall and BamHI sites [5]. The promoter region of *ospC* from  
42 *B. burgdorferi* B31-A3, 184 bp to 9 bp upstream of the start codon of *ospC* [6], was also PCR  
43 amplified, adding HindIII and Sall sites at the 5' and 3' ends, respectively, using primers pospCfp  
44 and pospCrp, and subcloned into the above mentioned pBSV2G encoding *ospC<sub>B31</sub>* #2 (S2  
45 Table).

46

47 **Verification of plasmid retention in spirochetes during infection.** pOspC plasmids are not  
48 stably retained in an *ospC*-deficient *B. burgdorferi* at 6 weeks post infection [7]. In addition, the  
49 pOspC plasmids utilized in this study were found to harbor a deletion of nucleotide 67 in *orf2* (P.  
50 Rosa, personal communication), resulting in a frameshift mutation on this gene. *orf2* along with  
51 the upstream and downstream genes *orf1* and *orf3* promotes autonomous replication of  
52 pBSV2G-derived plasmids such as pOspC in low passage *B. burgdorferi* [8]. To test whether

53 the pOspC plasmids were stably maintained in these *ospC*-complemented strains at 21d.p.i., *B.*  
54 *burgdorferi* pBSV2G-derived plasmids in the inoculation site of skin, heart, and ankle were  
55 quantified by qPCR (95.0°C for 5min, 95.0°C for 10 sec, 49.3°C for 30 sec repeated 40 times)  
56 using primers to amplify *colE1* origin of replication of pOspC (S2 Table) [8]. The ratio of *colE1* to  
57 *recA* copies for *in vitro*-cultivated spirochetes harboring pBSV2G, pOspC<sub>B31 #2</sub>, or pOspC<sub>B31-ECM</sub><sup>-</sup>  
58 varied between 0.89 and 0.98 (S3 Table). The ratio of *colE1* to *recA* copies for spirochetes  
59 harboring pOspC<sub>B31</sub>, pOspC<sub>B31 #2</sub>, pOspC<sub>N40-D10/E9</sub> or pOspC<sub>PBr</sub> in colonized tissues varied  
60 between 0.81 and 1.06 (S4 and S5 Tables), indicating that vast majority of spirochetes in these  
61 tissues retained the pOspC plasmids at 21 days post infection.

62

### 63 **Antibody titer determinations**

64 The antibody titer was determined as described [2]. Basically, recombinant GST-OspC<sub>B31</sub>, -  
65 OspC<sub>N40-D10/E9</sub>, and -OspC<sub>PBr</sub> proteins were mixed in coating buffer (0.05 M Na<sub>2</sub>CO<sub>3</sub>, pH 9.0) at  
66 10 µg/ml for each protein. Nunc maxisorp flat-bottom 96-well plates were then coated with 100  
67 µl of the OspC protein mixture overnight at 4°C. Plates were washed with wash buffer (PBS +  
68 0.05% Tween 20) three times and blocked for 1 hr in blocking buffer (PBS + 0.05% Tween 20 +  
69 1% BSA) then washed as above. Each tested serum sample was diluted 1:100, 1:300, and  
70 1:900, and incubated with the OspC-coated wells at ambient temperature for one hr. After  
71 washing, the wells were incubated in secondary antibody (HRP-conjugated goat anti-mouse IgM  
72 or IgG antibodies) (Bethyl Lab, Montgomery, TX) for one hr. After washing, the developing  
73 solution (SureBlue Reserve TMB 2-Component Microwell Peroxidase Substrate system (KPL))  
74 was added to each well. Plates were then read at OD<sub>650</sub> every minute for ten minutes using a  
75 Synergy HT ELISA plate reader (BioTek, Winooski, VT). The mean of the increasing OD<sub>650</sub>  
76 values per minutue was calculated to indicate the slope of increasing OD values. Among the  
77 slopes obtained from three dilutions of a particular serum sample, the maximal slope was used  
78 to represent the antibody titers of that sample. Controls included three dilutions (1:100, 1:300

79 and 1:900) of purified IgG or IgM (125 mg/ml; Bethyl Lab, Montgomery, TX) coated on microtiter  
80 plates, and uninfected (“naive”) serum run in parallel with sample sera. Antibody titers in serum  
81 samples were normalized by subtracting the antibody unit “background” of naive mice, and  
82 expressed relative to the control wells coated with purified IgG and IgM.

83

#### 84 **References**

- 85 1. Lin YP, Greenwood A, Nicholson LK, Sharma Y, McDonough SP, Chang YF. Fibronectin  
86 binds to and induces conformational change in a disordered region of leptospiral  
87 immunoglobulin-like protein B. *J Biol Chem.* 2009;284(35):23547-57.
- 88 2. Lin YP, Benoit V, Yang X, Martinez-Herranz R, Pal U, Leong JM. Strain-specific variation  
89 of the decorin-binding adhesin DbpA influences the tissue tropism of the Lyme disease  
90 spirochete. *PLoS Pathog.* 2014;10(7):e1004238.
- 91 3. Caine JA, Lin YP, Kessler JR, Sato H, Leong JM, Coburn J. *Borrelia burgdorferi* outer  
92 surface protein C (OspC) binds complement component C4b and confers bloodstream survival.  
93 *Cell Microbiol.* 2017. doi: 10.1111/cmi.12786.
- 94 4. Benoit VM, Fischer JR, Lin YP, Parveen N, Leong JM. Allelic variation of the Lyme  
95 disease spirochete adhesin DbpA influences spirochetal binding to decorin, dermatan sulfate,  
96 and mammalian cells. *Infect Immun.* 2011;79(9):3501-9.
- 97 5. Purser JE, Lawrenz MB, Caimano MJ, Howell JK, Radolf JD, Norris SJ. A plasmid-  
98 encoded nicotinamidase (PncA) is essential for infectivity of *Borrelia burgdorferi* in a mammalian  
99 host. *Mol Microbiol.* 2003;48(3):753-64.
- 100 6. Fischer JR, LeBlanc KT, Leong JM. Fibronectin binding protein BBK32 of the Lyme  
101 disease spirochete promotes bacterial attachment to glycosaminoglycans. *Infect Immun.*  
102 2006;74(1):435-41.

103 7. Tilly K, Krum JG, Bestor A, Jewett MW, Grimm D, Bueschel D, et al. *Borrelia burgdorferi*  
104 OspC protein required exclusively in a crucial early stage of mammalian infection. *Infect Immun.*  
105 2006;74(6):3554-64.

106 8. Stewart PE, Thalken R, Bono JL, Rosa P. Isolation of a circular plasmid region sufficient  
107 for autonomous replication and transformation of infectious *Borrelia burgdorferi*. *Mol Microbiol.*  
108 2001;39(3):714-21.

109
